# Supplementary material for: Molecular characteristic of treatment failure clinical isolates of Leishmania major
Source: PeerJ. 2021 Mar 11;9:e10969. doi: 10.7717/peerj.10969 (PMC7956003; doi:10.7717/peerj.10969)
Supplement: Supplemental Information 5 — Raw PCR data supporting the results shown in Fig. 3. [file peerj-09-10969-s005.xlsx]

## Sheet: Sheet1
Sample Name	Target Name	Task	Reporter	Quencher	RQ	RQ Min	RQ Max	Cт	Cт Mean	Cт SD	ΔCт	ΔCт Mean	ΔCт SE	HK Control ΔCт Mean	HK Control ΔCт SE	ΔΔCт	Automatic Ct Threshold	Ct Threshold	Automatic Baseline	Baseline Start	Baseline End	Efficiency	Tm1	Tm2	Tm3	Comments	NOAMP	EXPFAIL	MTP
	GAPDH	NTC	SYBR	None				Undetermined									TRUE	0.197694	TRUE	3	39	1	83.9428	74.7	87.9679		N	N	Y
	AQP	NTC	SYBR	None				Undetermined									TRUE	0.190267	TRUE	3	39	1	74.4018	70.973	67.3951		N	N	Y
Standard	GAPDH	UNKNOWN	SYBR	None				28.6029	28.6029								TRUE	0.197694	TRUE	3	24	1	81.7066	66.2025			N	N	Y
Standard	AQP	UNKNOWN	SYBR	None	1			28.4341	28.4341			-0.168787				0	TRUE	0.190267	TRUE	3	23	1	82.8993	65.9044			N	N	Y
TF4	GAPDH	UNKNOWN	SYBR	None				26.8618	26.8618								TRUE	0.197694	TRUE	3	22	1	81.5576	66.5007			N	N	Y
TF4	AQP	UNKNOWN	SYBR	None	0.74118			27.1251	27.1251			0.263317				0.432104	TRUE	0.190267	TRUE	3	22	1	82.8993				N	N	N
TF5	GAPDH	UNKNOWN	SYBR	None				24.037	24.037								TRUE	0.197694	TRUE	3	19	1	81.8557	66.6498			N	N	Y
TF5	AQP	UNKNOWN	SYBR	None	0.753483			24.2765	24.2765			0.239567				0.408354	TRUE	0.190267	TRUE	3	19	1	83.0484	66.9479			N	N	Y
TF1	GAPDH	UNKNOWN	SYBR	None				27.6972	27.6972								TRUE	0.197694	TRUE	3	23	1	82.0048	65.4571			N	N	Y
TF1	AQP	UNKNOWN	SYBR	None	0.666			28.1148	28.1148			0.41762				0.586407	TRUE	0.190267	TRUE	3	23	1	83.1974	66.7988			N	N	Y
TF2	GAPDH	UNKNOWN	SYBR	None				35.2361	35.2361								TRUE	0.197694	TRUE	3	30	1	81.4085	65.4571			N	N	Y
TF2	AQP	UNKNOWN	SYBR	None	2.75474			33.6054	33.6054			-1.6307				-1.46192	TRUE	0.190267	TRUE	3	29	1	82.6011	66.0534			N	N	Y
TF3	GAPDH	UNKNOWN	SYBR	None				26.3334	26.3334								TRUE	0.197694	TRUE	3	21	1	81.5576	66.5007			N	N	Y
TF3	AQP	UNKNOWN	SYBR	None	0.669595			26.7432	26.7432			0.409853				0.57864	TRUE	0.190267	TRUE	3	22	1	82.6011	66.6498			N	N	Y
